# Supplementary material for: Holocene climates of the Iberian Peninsula: pollen-based reconstructions of changes in the west–east gradient of temperature and moisture
Source: Copernicus journal article supplement (doi:10.5194/cp-19-803-2023), 2023-04-05
Supplement: Supplementary file 1 [file cp-19-803-2023-supplement.pdf]

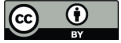

*Supplement of*

## **Holocene climates of the Iberian Peninsula: pollen-based reconstructions of changes in the west–east gradient of temperature and moisture**

**Mengmeng Liu et al.**

*Correspondence to:* Mengmeng Liu (m.liu18@imperial.ac.uk)

The copyright of individual parts of the supplement might differ from the article licence.

Figure S1. Map showing the location of the SMPDS sites. The colour indicates the modern (a) MTCO, (b) MTWA and (c)  $\alpha$  values.

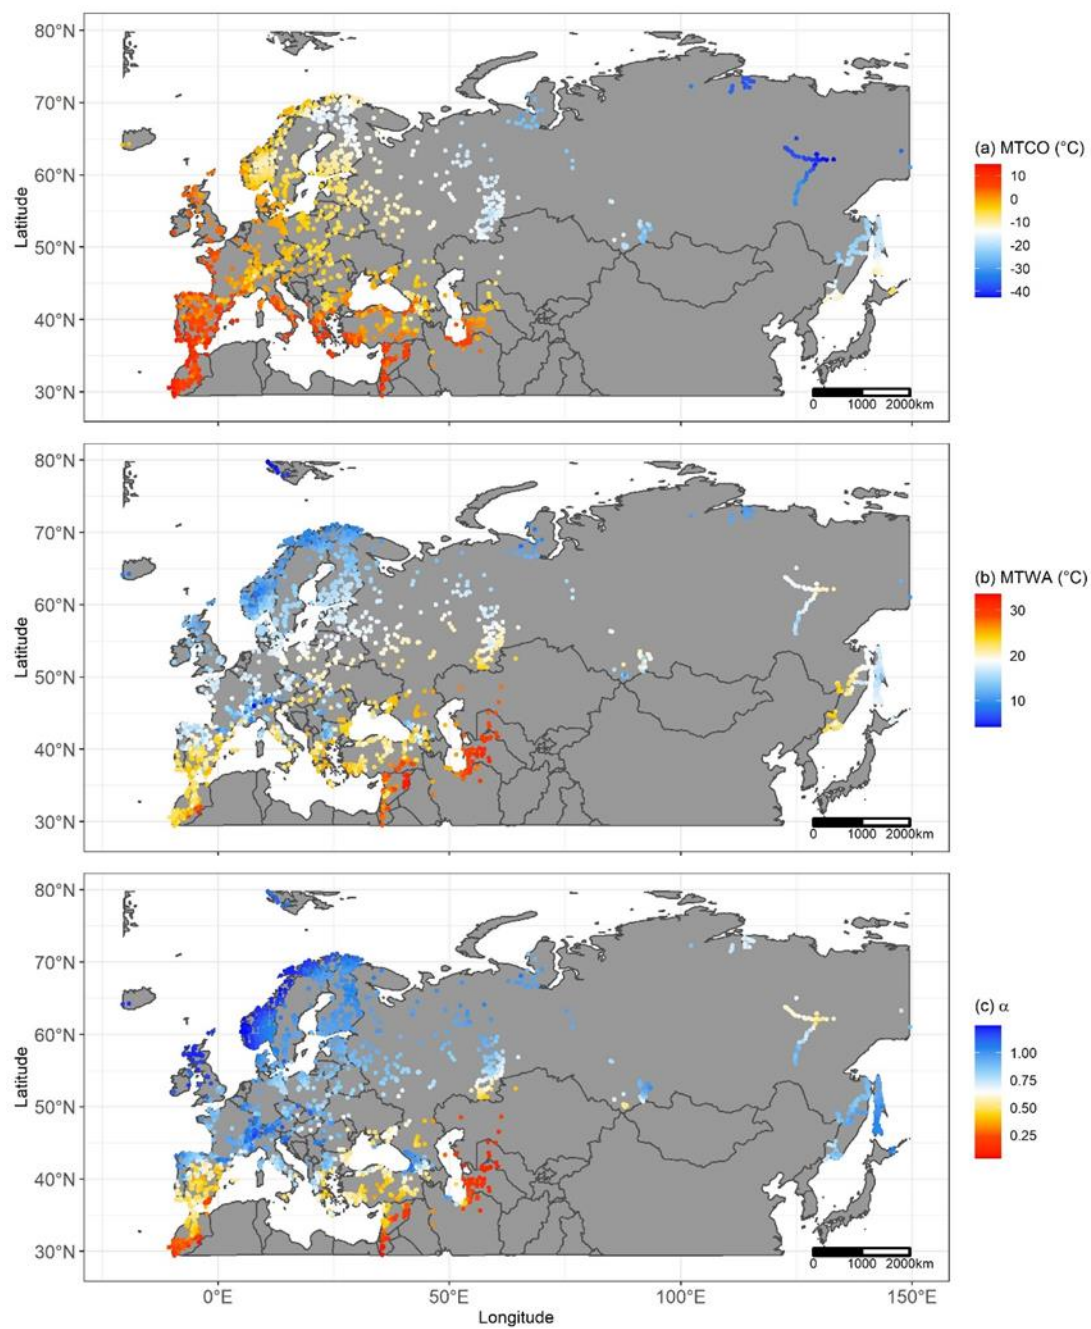

Figure S2. Changes in the west-east gradient of mean temperature of the coldest month (MTCO) through time, represented by anomalies in MTCO relative to 0.5 ka at individual sites. The red lines show the regression lines. The shades indicate the 95 % confidence intervals of the regression lines.

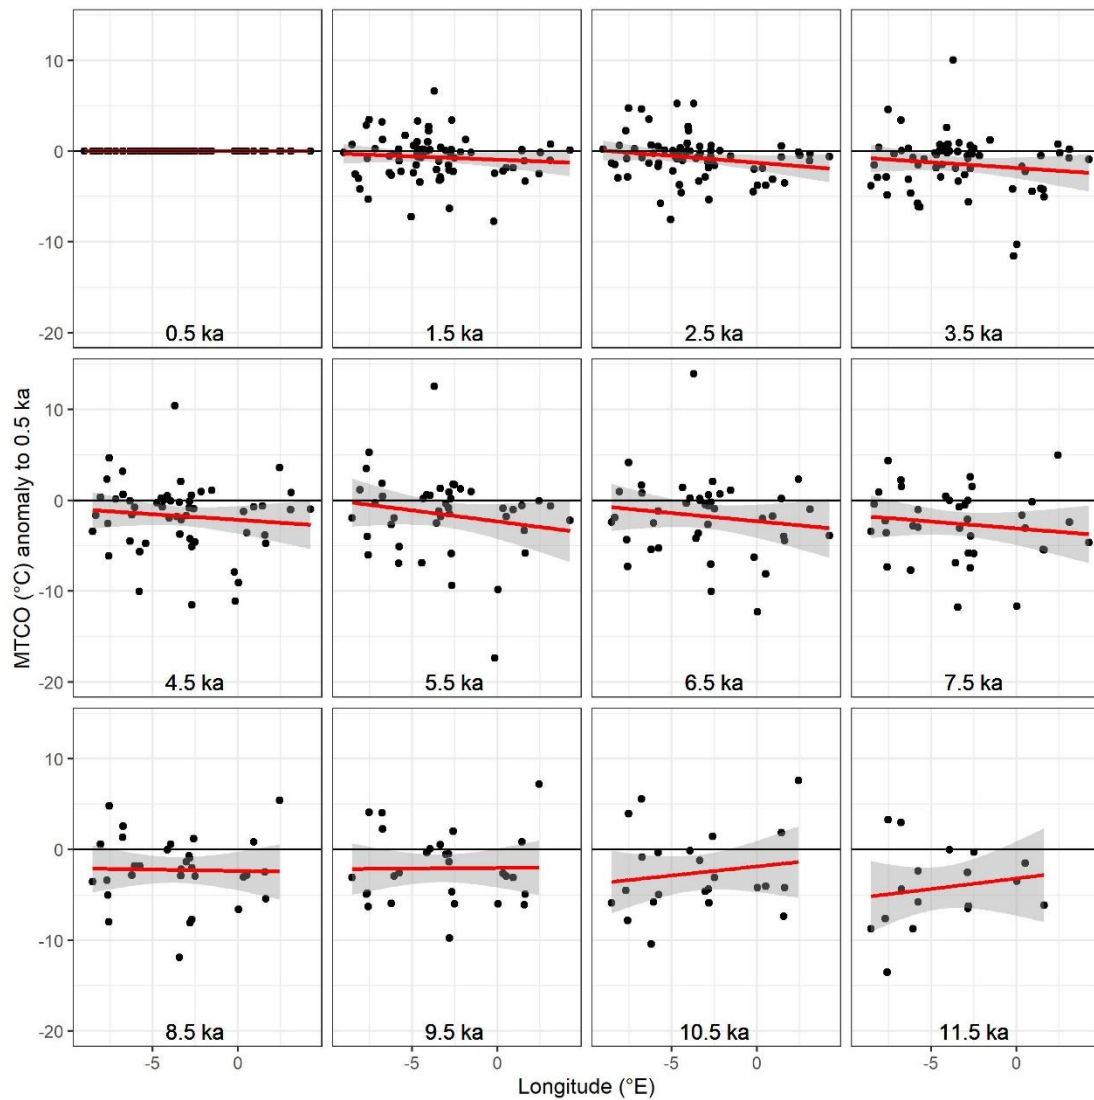

Figure S3. Changes in the west-east gradient of plant-available moisture as represented by anomalies in  $\alpha$  relative to 0.5 ka at individual high (>1000 m) and low (<1000 m) elevation sites through the Holocene. The red lines show the regression lines. The shades indicate the 95 % confidence intervals of the regression lines.

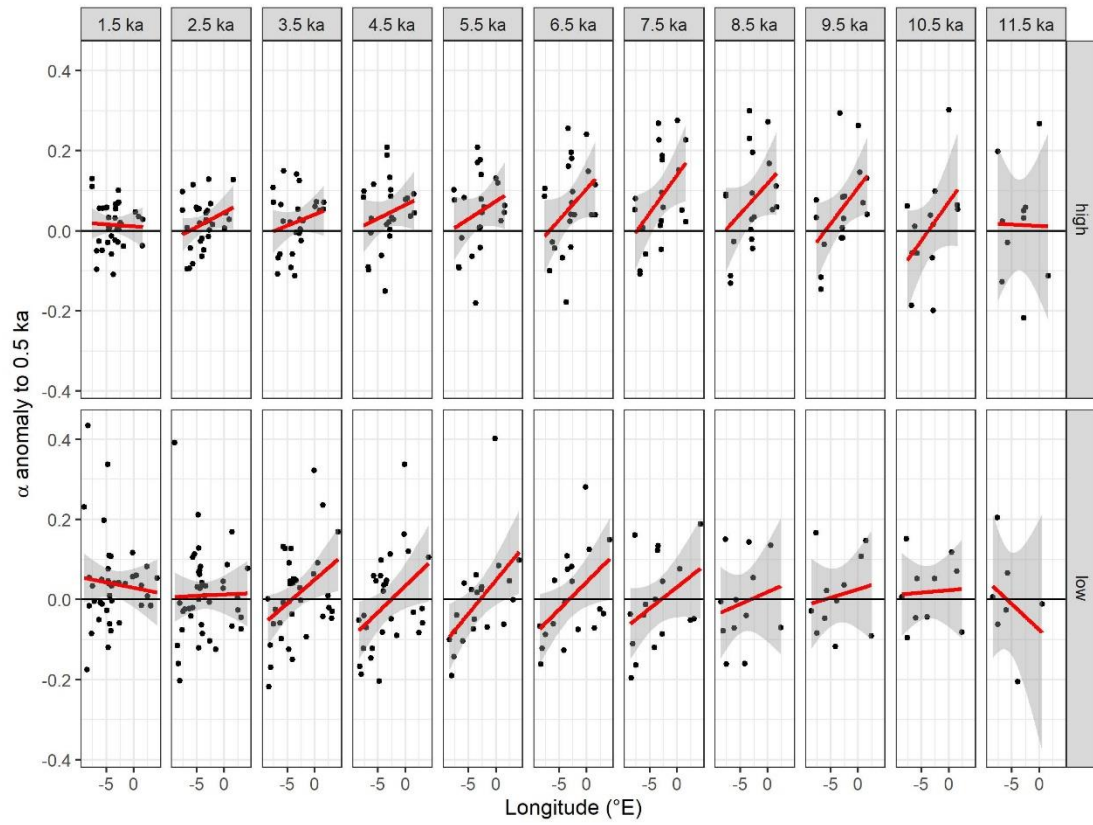

Figure S4. Changes in the elevational gradient of plant-available moisture through time, as represented by anomalies in  $\alpha$  relative to 0.5 ka at individual sites. The red lines show the regression lines. The shades indicate the 95 % confidence intervals of the regression lines.

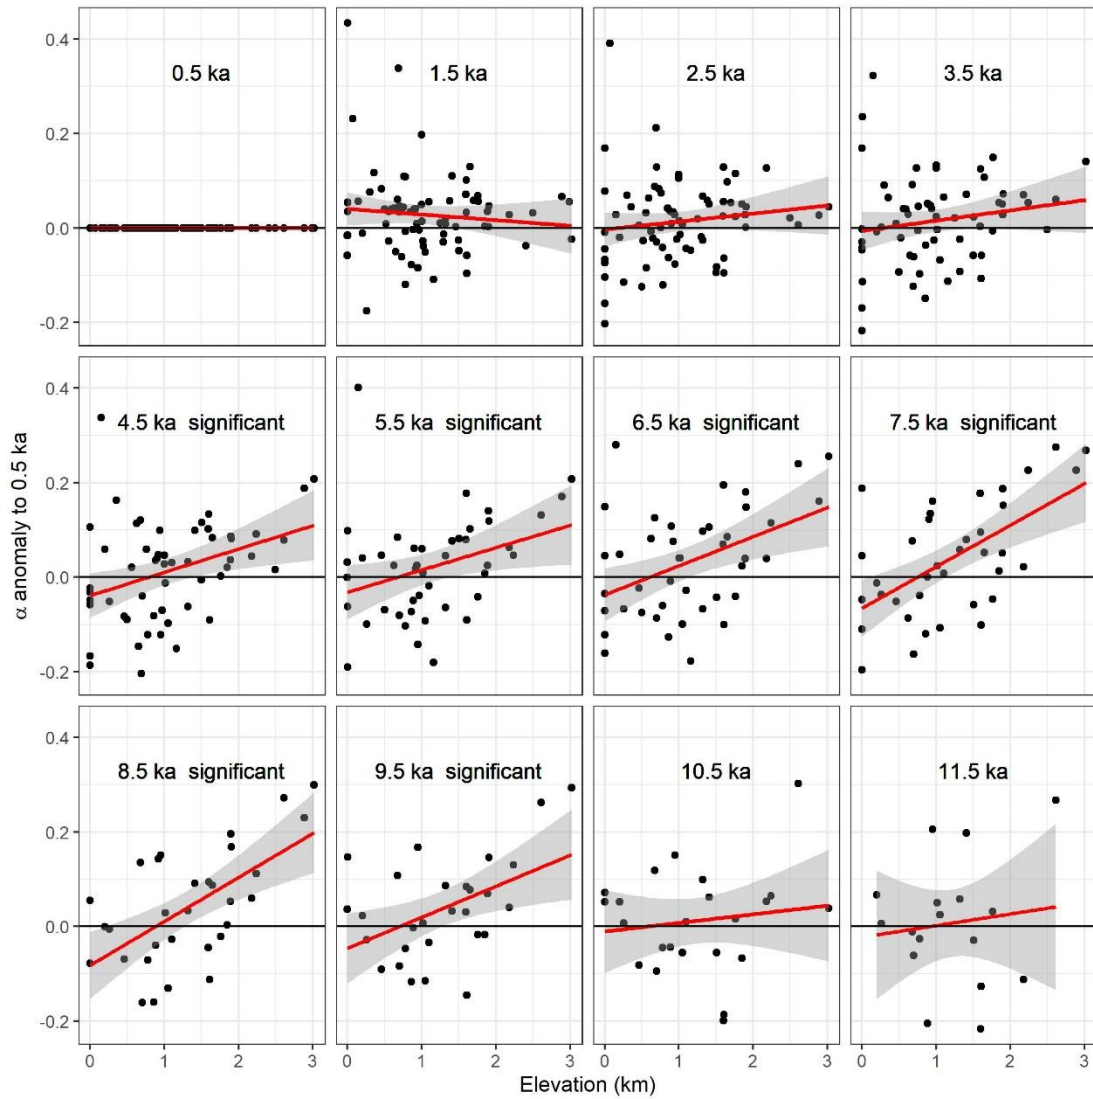

Figure S5. Changes in the west-east gradient of mean temperature of the warmest month (MTWA) through time, as represented by anomalies in MTWA relative to 0.5 ka at individual sites. The red lines show the regression lines. The shades indicate the 95 % confidence intervals of the regression lines.

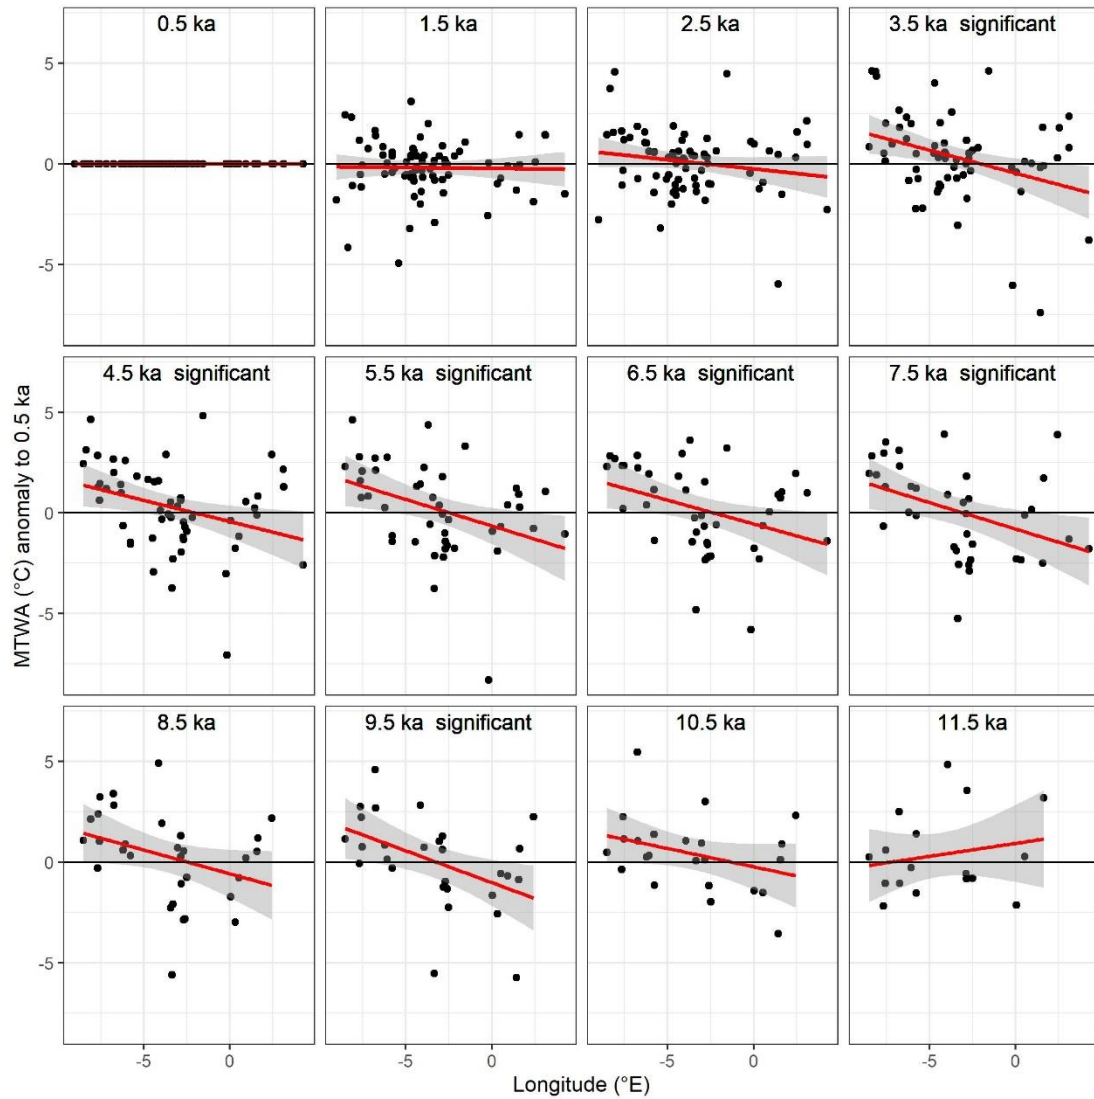

Figure S6. Changes in the west-east gradient of mean temperature of the warmest month (MTWA) as represented by anomalies in MTWA relative to 0.5 ka at individual high (>1000 m) and low (<1000 m) elevation sites through the Holocene. The red lines show the regression lines. The shades indicate the 95 % confidence intervals of the regression lines.

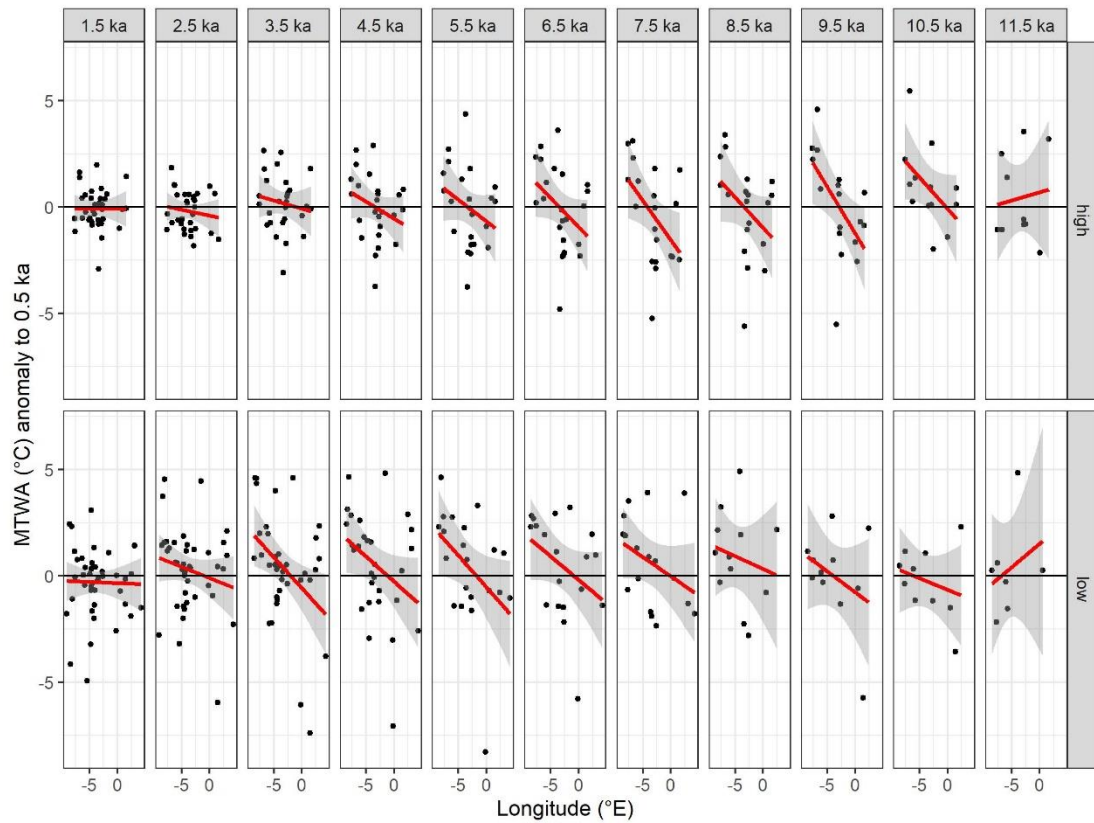

Figure S7. Changes in the elevational gradient of mean temperature of the warmest month (MTWA) through time, as represented by anomalies in MTWA relative to 0.5 ka at individual sites. The red lines show the regression lines. The shades indicate the 95 % confidence intervals of the regression lines.

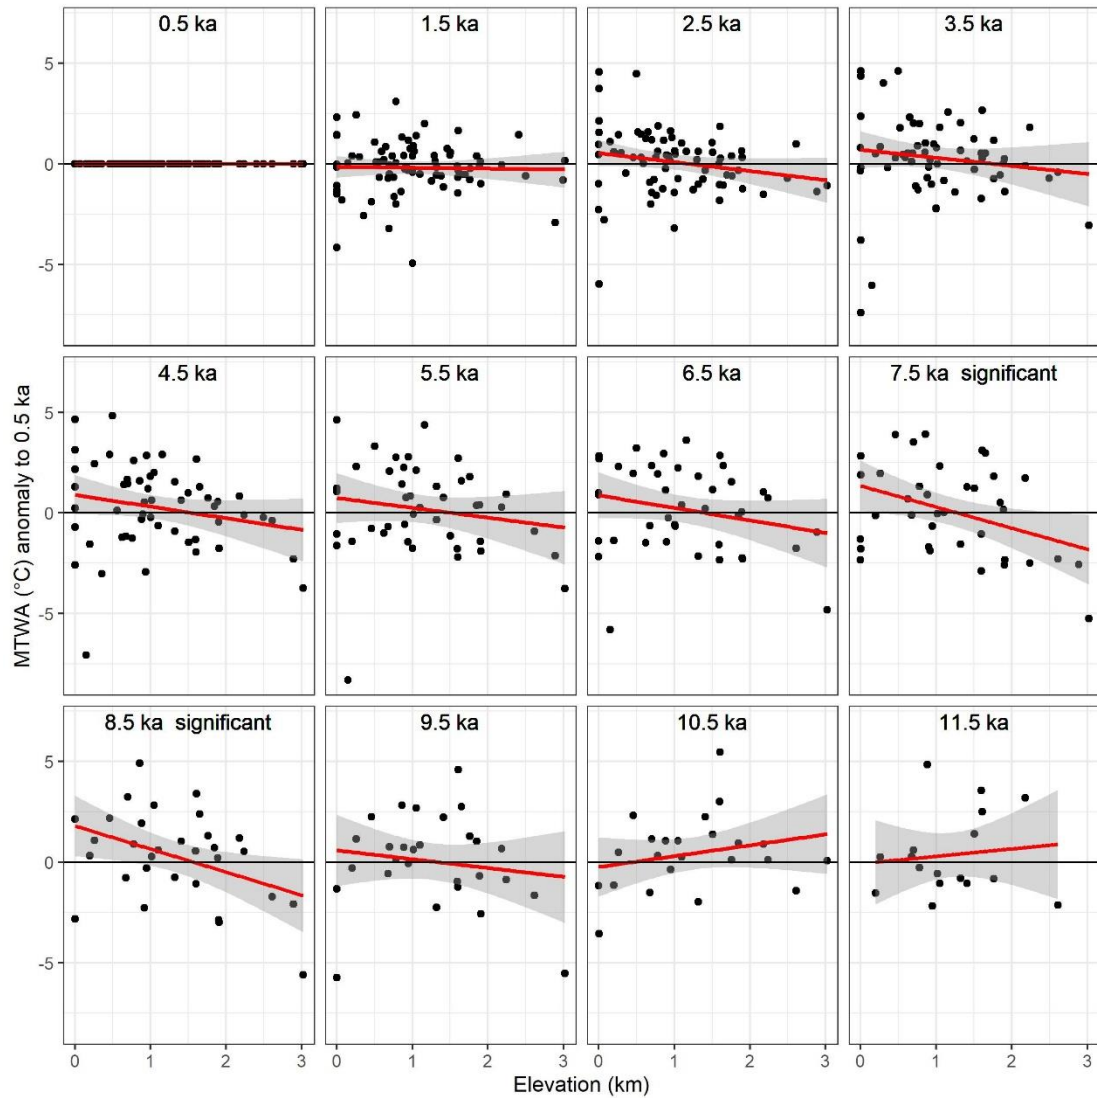



Figure S8. The difference between the westmost and eastmost simulated mean daily precipitation in Iberian Peninsula between 8 ka and 0 ka, smoothed using 100 year bins. Here BP means before 1950 AD. The black lines represent Max Planck Institute Earth System Model (MPI) simulations, the red lines represent Alfred Wagner Insitute Earth System Model (AWI) simulations, the blue lines represent Institut Pierre Simon Laplace Climate Model (IPSL-CM5) TR5AS simulations, the gold lines represent Institut Pierre Simon Laplace Climate Model (IPSL-CM6) TR6AV simulations.

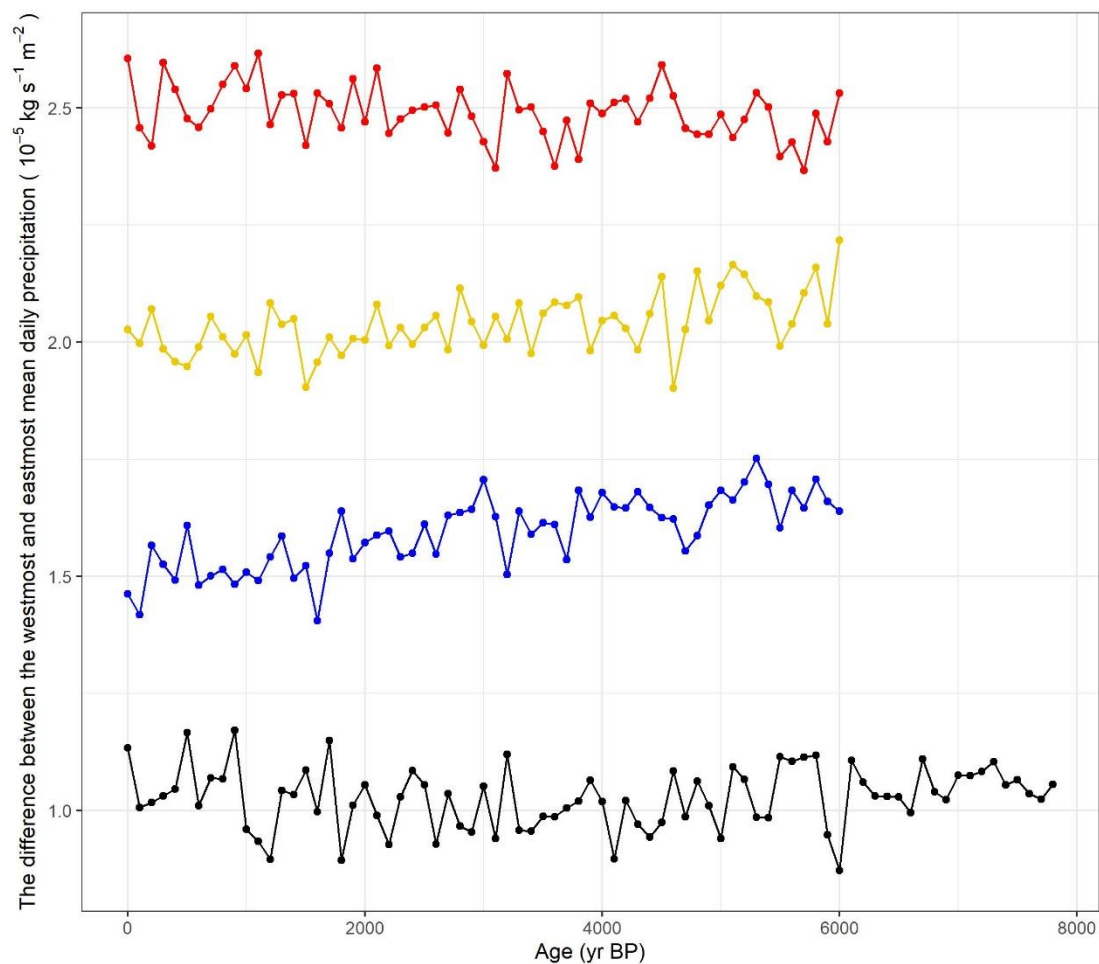

Figure S9. Reconstructed mean temperature of the warmest month (MTWA) at Basa de la Mora using fxTWA-PLS2. The grey shades represent the 95% confidence intervals.

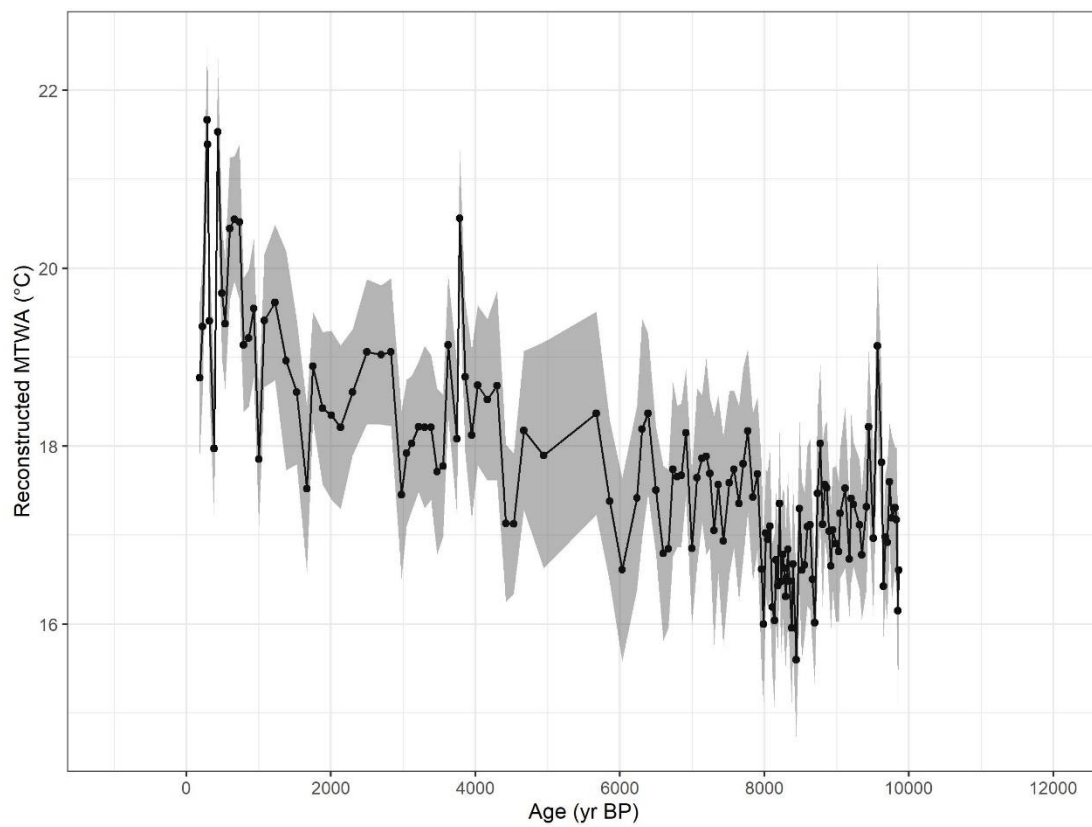

Figure S10. Reconstructed composite changes (anomalies to 0.5 ka) in (a) mean temperature of the coldest month (MTCO), (b) mean temperature of the warmest month (MTWA) and (c) plant-available moisture as represented by  $\alpha$ , through the Holocene compared to changes in (d) winter and (e) summer insolation for the latitude of the Iberian Peninsula, using  $\pm 500$  years as the bin. The black lines show mean values across sites, with vertical line segments showing the standard deviations of mean values using 1000 bootstrap cycles of site resampling. The reconstructions of MTCO, MTWA and  $\alpha$  are made using the original version of fxTWA-PLS (fx-TWA-PLS1).

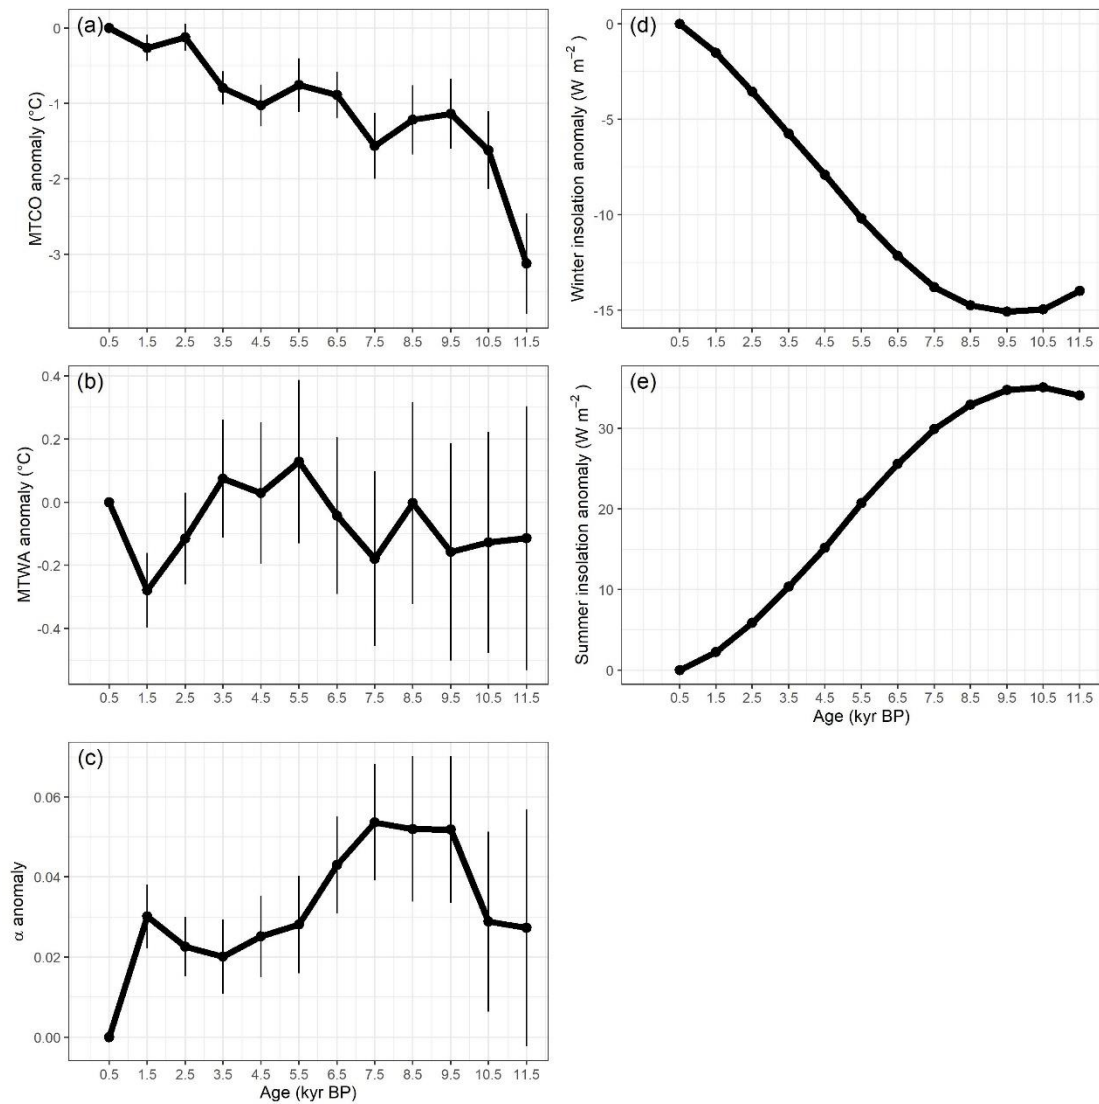

Figure S11. Canonical Correspondence Analysis (CCA) plots of modern and fossil-reconstructed MTCO, MTWA and  $\alpha$ .

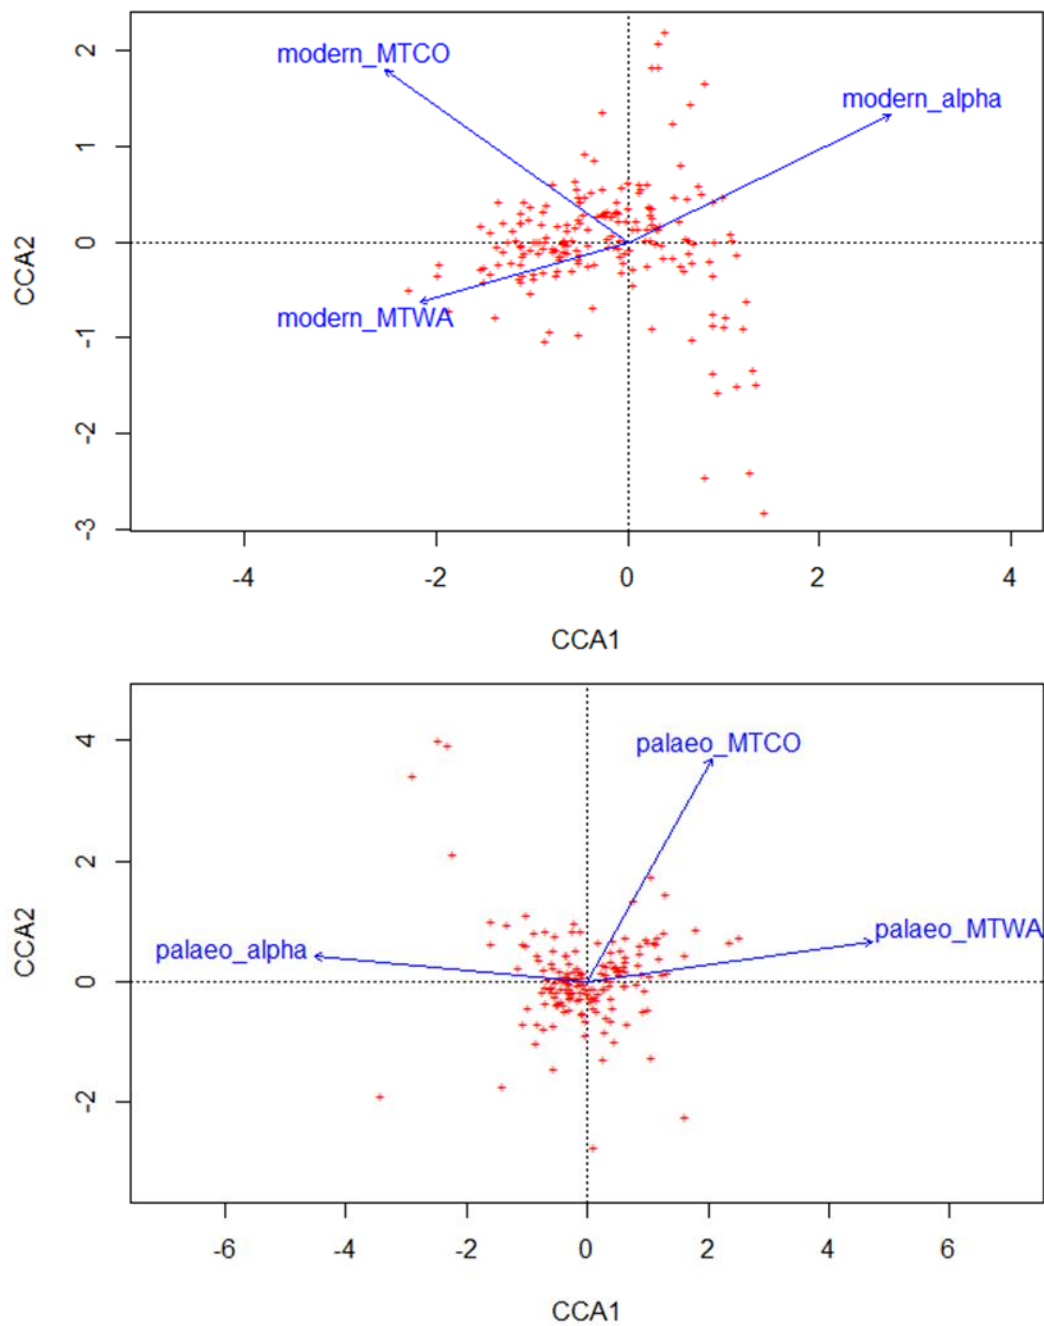

Table S1. Obligate aquatics, insectivorous species, introduced species, and taxa that only occur in cultivation.

| Name                     | The reason why it was removed |
|--------------------------|-------------------------------|
| Alisma                   | aquatic                       |
| Alisma plantago-aquatica | aquatic                       |
| Alismataceae             | aquatic                       |
| Althaenia                | aquatic                       |
| Aponogeton               | aquatic                       |
| Avena                    | cultivar                      |
| Avena sativa             | cultivar                      |
| Azolla                   | aquatic                       |
| Azolla africana          | aquatic                       |
| Azolla filiculoides      | aquatic                       |
| Baldellia                | aquatic                       |
| Baldellia ranunculoides  | aquatic                       |
| Batrachium               | aquatic                       |
| Brasenia                 | aquatic                       |
| Brasenia schreberi       | aquatic                       |
| Butomaceae               | aquatic                       |
| Butomus                  | aquatic                       |
| Butomus umbellatus       | aquatic                       |
| Cabomba                  | aquatic                       |
| Caldesia parnassifolia   | aquatic                       |
| Calla                    | aquatic                       |
| Calla palustris          | aquatic                       |
| Callitriche              | aquatic                       |
| Callitriche obtusangula  | aquatic                       |
| Callitriche stagnalis    | aquatic                       |
| Caltha                   | aquatic                       |
| Caltha leptosepala       | aquatic                       |
| Caltha palustris         | aquatic                       |

|                                    |             |
|------------------------------------|-------------|
| Cannabaceae                        | cultivar    |
| Cannabis                           | cultivar    |
| Cannabis sativa                    | cultivar    |
| Carya                              | introduced  |
| Casuarina                          | introduced  |
| Celtis reticulata                  | introduced  |
| Centella asiatica                  | aquatic     |
| Centrostachys aquatica             | aquatic     |
| Ceratophyllaceae                   | aquatic     |
| Ceratophyllum                      | aquatic     |
| Ceratophyllum demersum             | aquatic     |
| Ceratophyllum kolce                | aquatic     |
| Ceratopteris                       | aquatic     |
| Ceratopteris cornuta               | aquatic     |
| Cerealialia                        | cultivar    |
| Cicuta                             | aquatic     |
| Cicuta virosa                      | aquatic     |
| Cladium                            | aquatic     |
| Cladium mariscoides                | aquatic     |
| Cladium mariscus                   | aquatic     |
| Cladium mariscus subsp. jamaicense | aquatic     |
| Comarum                            | aquatic     |
| Comarum palustre                   | aquatic     |
| Crinum natans                      | aquatic     |
| Damasonium                         | aquatic     |
| Drosera                            | carnivorous |
| Drosera anglica                    | carnivorous |
| Drosera binata                     | carnivorous |
| Drosera rotundifolia               | carnivorous |
| Droseraceae                        | carnivorous |
| Echinodorus                        | aquatic     |

|                             |            |
|-----------------------------|------------|
| Eichhornia                  | aquatic    |
| Eichhornia crassipes        | aquatic    |
| Elatine                     | aquatic    |
| Elodea                      | aquatic    |
| Eucommia                    | introduced |
| Fagopyrum                   | cultivar   |
| Fagopyrum esculentum        | cultivar   |
| Fagopyrum tataricum         | cultivar   |
| Fothergila major            | introduced |
| Glyceria                    | aquatic    |
| Glyceria maxima             | aquatic    |
| Helianthus annuus           | cultivar   |
| Helosciadium inundatum      | aquatic    |
| Heteranthera                | aquatic    |
| Hippuris                    | aquatic    |
| Hippuris vulgaris           | aquatic    |
| Hordeum                     | cultivar   |
| Hottonia                    | aquatic    |
| Hottonia palustris          | aquatic    |
| Humulus                     | cultivar   |
| Humulus lupulus             | cultivar   |
| Hydrocharis                 | aquatic    |
| Hydrocharis morsus-ranae    | aquatic    |
| Hydrocharitaceae            | aquatic    |
| Hydrocleys                  | aquatic    |
| Hydrocotyle                 | aquatic    |
| Hydrocotyle novae-zelandiae | aquatic    |
| Hydrocotyle ranunculoides   | aquatic    |
| Hydrocotyle umbellata       | aquatic    |
| Hydrocotyle vulgaris        | aquatic    |
| Hygrophila                  | aquatic    |

|                            |             |
|----------------------------|-------------|
| Isoetes                    | aquatic     |
| Isoetes echinospora        | aquatic     |
| Isoetes histrix            | aquatic     |
| Isoetes lacustris          | aquatic     |
| Isoetes setacea            | aquatic     |
| Keteeleria                 | introduced  |
| Lemna                      | aquatic     |
| Lemna minor                | aquatic     |
| Lemna valdiviana           | aquatic     |
| Lemnaceae                  | aquatic     |
| Lemnoideae                 | aquatic     |
| Lentibulariaceae           | carnivorous |
| Lepilaena                  | aquatic     |
| Limosella aquatica         | aquatic     |
| Littorella                 | aquatic     |
| Littorella uniflora        | aquatic     |
| Ludwigia palustris         | aquatic     |
| Machaeranthera tortifolia  | introduced  |
| Marsileaceae               | aquatic     |
| Martretia                  | aquatic     |
| Menyanthaceae              | aquatic     |
| Menyanthes                 | aquatic     |
| Menyanthes trifoliata      | aquatic     |
| Monochoria                 | aquatic     |
| Myosoton aquaticum         | aquatic     |
| Myriophyllum               | aquatic     |
| Myriophyllum alterniflorum | aquatic     |
| Myriophyllum aquaticum     | aquatic     |
| Myriophyllum sibiricum     | aquatic     |
| Myriophyllum spicatum      | aquatic     |
| Myriophyllum verticillatum | aquatic     |



|                              |             |
|------------------------------|-------------|
| Nelumbo                      | aquatic     |
| Nepenthes                    | carnivorous |
| Neprophyllidium crista-galli | aquatic     |
| Nicotiana tabacum            | cultivar    |
| Nuphar                       | aquatic     |
| Nuphar lutea                 | aquatic     |
| Nuphar polysepala            | aquatic     |
| Nymphaea                     | aquatic     |
| Nymphaea alba                | aquatic     |
| Nymphaea lotus               | aquatic     |
| Nymphaea nouchali            | aquatic     |
| Nymphaea odorata             | aquatic     |
| Nymphaeaceae                 | aquatic     |
| Nymphoides                   | aquatic     |
| Nymphoides indica            | aquatic     |
| Nymphoides peltata           | aquatic     |
| Oenanthe aquatica            | aquatic     |
| Oenanthe aquatica            | aquatic     |
| Oryza                        | cultivar    |
| Oryza sativa                 | cultivar    |
| Ottelia                      | aquatic     |
| Parthenocissus               | introduced  |
| Paulownia                    | introduced  |
| Phacelia                     | introduced  |
| Phragmites                   | aquatic     |
| Phragmites australis         | aquatic     |
| Pilularia                    | aquatic     |
| Pilularia globulifera        | aquatic     |
| Pinguicula                   | carnivorous |
| Pinguicula vulgaris          | carnivorous |
| Pistia stratiotes            | aquatic     |

|                             |            |
|-----------------------------|------------|
| Plantago uniflora           | aquatic    |
| Polygonum (aquatic)         | aquatic    |
| Polypodium pellucidum       | introduced |
| Pontederia                  | aquatic    |
| Pontederiaceae              | aquatic    |
| Potamogeton                 | aquatic    |
| Potamogeton natans          | aquatic    |
| Potamogeton pectinatus      | aquatic    |
| Potamogeton thunbergii      | aquatic    |
| Potamogetonaceae            | aquatic    |
| Potentilla palustris        | aquatic    |
| Ranunculus acris            | aquatic    |
| Ranunculus aquatilis        | aquatic    |
| Ranunculus batrachioides    | aquatic    |
| Ranunculus flammula         | aquatic    |
| Ranunculus lingua           | aquatic    |
| Ranunculus peltatus         | aquatic    |
| Ranunculus sceleratus       | aquatic    |
| Ranunculus trichophyllus    | aquatic    |
| Rheum officinale            | introduced |
| Ribes montigenum type       | introduced |
| Rorippa amphibia            | aquatic    |
| Ruppia                      | aquatic    |
| Ruppia maritima             | aquatic    |
| Ruppiaceae                  | aquatic    |
| Sagittaria                  | aquatic    |
| Sagittaria guayanensis type | aquatic    |
| Sagittaria sagittifolia     | aquatic    |
| Salvinia                    | aquatic    |
| Samolus valerandi           | aquatic    |
| Sarcobatus                  | introduced |

|                          |             |
|--------------------------|-------------|
| Sarracenia               | carnivorous |
| Scheuchzeria             | aquatic     |
| Scheuchzeria palustris   | aquatic     |
| Secale                   | cultivar    |
| Sparganiaceae            | aquatic     |
| Sparganium               | aquatic     |
| Sparganium angustifolium | aquatic     |
| Sparganium emersum       | aquatic     |
| Sparganium erectum       | aquatic     |
| Sparganium minimum       | aquatic     |
| Steris segetalis         | aquatic     |
| Stratiotes               | aquatic     |
| Stratiotes aloides       | aquatic     |
| Stuckenia                | aquatic     |
| Stuckenia pectinata      | aquatic     |
| Stuckenia vaginata       | aquatic     |
| Symphoricarpus           | introduced  |
| Trapa                    | aquatic     |
| Trapa natans             | aquatic     |
| Triglochin               | aquatic     |
| Triglochin maritima      | aquatic     |
| Triticum                 | cultivar    |
| Typha                    | aquatic     |
| Typha angustifolia       | aquatic     |
| Typha domingensis        | aquatic     |
| Typha latifolia          | aquatic     |
| Typha minima             | aquatic     |
| Typha orientalis         | aquatic     |
| Typhaceae                | aquatic     |
| Utricularia vulgaris     | aquatic     |
| Vitis                    | cultivar    |

|                        |          |
|------------------------|----------|
| Vitis vinifera         | cultivar |
| Zannichellia           | aquatic  |
| Zannichellia palustris | aquatic  |
| Zea                    | cultivar |
| Zea mays               | cultivar |
| Zizania                | aquatic  |
| Zizania aquatica       | aquatic  |

Table S2. Relative contributions of individual taxa to the reconstructions of mean temperature of the coldest month (MTCO), mean temperature of the warmest month (MTWA) and plant-available moisture ( $\alpha$ ). The plots show the top 10 taxa for each end of the climate gradient after first screening out taxa that are relatively rare (i.e. occur < the median number of occurrences of all taxa in the fossil pollen record, which is 178 samples).

|                                                                                                        | <b>MTCO</b>                 | <b>MTWA</b>           |                                                                                                        | <b><math>\alpha</math></b> |
|--------------------------------------------------------------------------------------------------------|-----------------------------|-----------------------|--------------------------------------------------------------------------------------------------------|----------------------------|
| <br>Increasing cold   | <i>Abies</i>                | <i>Ilex</i>           | <br>Increasing wet   | <i>Myrica</i>              |
|                                                                                                        | <i>Tilia</i>                | <i>Taxus</i>          |                                                                                                        | <i>Taxus</i>               |
|                                                                                                        | <i>Thalictrum</i>           | <i>Saxifragaceae</i>  |                                                                                                        | <i>Ilex</i>                |
|                                                                                                        | <i>Betula</i>               | <i>Myrica</i>         |                                                                                                        | <i>Calluna</i>             |
|                                                                                                        | <i>Onagraceae</i>           | <i>Orobanchaceae</i>  |                                                                                                        | <i>Orobanchaceae</i>       |
|                                                                                                        | <i>Ericaceae</i>            | <i>Calluna</i>        |                                                                                                        | <i>Sorbus</i>              |
|                                                                                                        | <i>Lycopodium</i>           | <i>Potentilla</i>     |                                                                                                        | <i>Potentilla</i>          |
|                                                                                                        | <i>Salix</i>                | <i>Onagraceae</i>     |                                                                                                        | <i>Betula</i>              |
|                                                                                                        | <i>Ulmus</i>                | <i>Sorbus</i>         |                                                                                                        | <i>Onagraceae</i>          |
|                                                                                                        | <i>Orobanchaceae</i>        | <i>Salix</i>          |                                                                                                        | <i>Ericaceae</i>           |
| ...                                                                                                    |                             |                       |                                                                                                        |                            |
| <br>Increasing warm | <i>Quercus.intermediate</i> | <i>Amaranthaceae</i>  | <br>Increasing dry | <i>Olea</i>                |
|                                                                                                        | <i>Phillyrea</i>            | <i>Myrtaceae</i>      |                                                                                                        | <i>Myrtaceae</i>           |
|                                                                                                        | <i>Cistaceae</i>            | <i>Cistus</i>         |                                                                                                        | <i>Quercus.evergreen</i>   |
|                                                                                                        | <i>Oleaceae</i>             | <i>Amaryllidaceae</i> |                                                                                                        | <i>Pistacia</i>            |
|                                                                                                        | <i>Cistus</i>               | <i>Phillyrea</i>      |                                                                                                        | <i>Cistaceae</i>           |
|                                                                                                        | <i>Arbutus</i>              | <i>Pistacia</i>       |                                                                                                        | <i>Amaryllidaceae</i>      |
|                                                                                                        | <i>Pistacia</i>             | <i>Ephedra</i>        |                                                                                                        | <i>Cistus</i>              |
|                                                                                                        | <i>Myrtaceae</i>            | <i>Thymelaeaceae</i>  |                                                                                                        | <i>Ephedra</i>             |
|                                                                                                        | <i>Ilex</i>                 | <i>Tamarix</i>        |                                                                                                        | <i>Tamarix</i>             |
|                                                                                                        | <i>Thymelaeaceae</i>        | <i>Oleaceae</i>       |                                                                                                        | <i>Thymelaeaceae</i>       |

### Reference list for Table 1:

- Abel-Schaad, D. & López-Sáez, J. A. Vegetation changes in relation to fire history and human activities at the Peña Negra mire (Bejar Range, Iberian Central Mountain System, Spain) during the past 4,000 years. *Veg. Hist. Archaeobot.* 22, 199-214 (2013).
- Abel-Schaad, D., Alba-Sánchez, F., Pérez-Díaz, S. & López-Sáez, J. A. 36. Praillos de Boissier mire, Tejeda Natural Park (Baetic Range, southern Spain). *Grana* 56, 475-477 (2017).
- Abel-Schaad, D., Hernández Carretero, A. M., López-Merino, L., Pulido Díaz, F. J. & López Sáez, J. A. Cabras y quemorros: tres siglos de cambios en el paisaje de la vertiente extremeña de la Sierra de Gredos. *Rev. Estud. Extremeños* 1, 449-478 (2009).
- Abel-Schaad, D. et al. Evolución de la vegetación en la Sierra de Gata (Cáceres-Salamanca, España) durante el Holoceno reciente. Implicaciones biogeográficas. *Rev. Española Micropaleontol.* 41, 91-105 (2009).
- Alba-Sánchez, F. et al. The impact of climate and land-use changes on the most southerly fir forests (*Abies pinsapo*) in Europe. *The Holocene* 29, 1176-1188 (2019).
- Allen, J. R. M., Huntley, B. & Watts, W. A. The vegetation and climate of northwest Iberia over the last 14,000 years. *J. Quat. Sci.* 11, 125-147 (1996).
- Anderson, R. S., Jiménez-Moreno, G., Carrión, J. S. & Pérez-Martínez, C. Postglacial history of alpine vegetation, fire, and climate from Laguna de Río Seco, Sierra Nevada, southern Spain. *Quat. Sci. Rev.* 30, 1615-1629 (2011).
- Burjachs, F. Palynology of the Upper Pleistocene and Holocene of the north-east Iberian Peninsula: Pla De L'Estany (Catalonia). *Hist. Biol.* 9, 17-33 (1994).
- Burjachs Casas, F. 1996. La secuencia palinológica de La Cruz (Cuenca, España). Pages 31-58 in M.B. Ruz-Zapata, editor. *Estudios palinológicos*, Alcalá de Henares: Servicio de Publicaciones de la Universidad de Alcalá edition. Spain.
- Burjachs, F. & Expósito, I. Charcoal and pollen analysis: Examples of Holocene fire dynamics in Mediterranean Iberian Peninsula. *Catena* 135, 340-349 (2015).
- Burjachs Casas, F., R.P. Pérez-Obiol, J.M. Roure, and R. Julià Brugués. Dinámica de la vegetación durante el Holoceno en la isla de Mallorca. Pages 199-210 in X Simposio de Palinología (APLE), Valencia, Spain. 199-210 (1994).
- Burjachs, F. et al. Palinología holocénica y desertización en el mediterráneo occidental. In: *Palinología holocénica y desertización en el mediterráneo occidental*, 379-294 (1997).
- Burjachs, F. et al. Overview of environmental changes and human colonization in the Balearic Islands (Western Mediterranean) and their impacts on vegetation composition during the Holocene. *J. Archaeol. Sci. Reports* 12, 845-859 (2017).
- Cano Villanueva, J. P. Estudi palinologic de sediments litorals de la provincia d'Imeria. Transformacions del paisatge vegetal en un territori semiàrid. (Universitat Autònoma de Barcelona, Barcelona, Spain, 1997).
- Carrión, J.S. Patterns and processes of Late Quaternary environmental change in a montane region of southwestern Europe. *Quat. Sci. Rev.* 21, 2047-2066 (2002).
- Carrion, J. S. & Dupre, M. Late Quaternary vegetational history at Navarrés, Eastern Spain. A two core approach. *New Phytol.* 134, 177-191 (1996).

- Carrión, J. S. & Van Geel, B. Fine-resolution Upper Weichselian and Holocene palynological record from Navarres (Valencia, Spain) and a discussion about factors of Mediterranean forest succession. *Rev. Palaeobot. Palynol.* 106, 209-236 (1999).
- Carrión, J.S., Andrade, A., Bennett, K. D., Navarro, C. & Munuera, M. Crossing forest thresholds: inertia and collapse in a Holocene sequence from south-central Spain. *The Holocene* 11, 635-653 (2001).
- Carrión, J. S., Munuera, M., Dupré, M. & Andrade, A. Abrupt vegetation changes in the Segura Mountains of southern Spain throughout the Holocene. *J. Ecol.* 89, 783-797 (2001).
- Carrión, J. S., Sánchez-Gómez, P., Mota, J. F., Yll, R. & Chaín, C. Holocene vegetation dynamics, fire and grazing in the Sierra de Gádor, southern Spain. *The Holocene* 13, 839-849 (2003).
- Carrión, J. S., Yll, E. I., Willis, K. J. & Sánchez, P. Holocene forest history of the eastern plateaux in the Segura Mountains (Murcia, southeastern Spain). *Rev. Palaeobot. Palynol.* 132, 219-236 (2004).
- Carrión, J. S. et al. Holocene environmental change in a montane region of southern Europe with a long history of human settlement. *Quat. Sci. Rev.* 26, 1455-1475 (2007).
- Cerrillo Cuenca, E. & González Cordero, A. Burial prehistoric caves in the interior basin of River Tagus: the complex at Canaleja Gorge (Romangordo, Cáceres, Spain). *BAR Int. Ser.* 2219, 21-42 (2011).
- Cerrillo Cuenca, E., González Cordero, A. & López Sáez, J. A. El proyecto de investigación de Garganta Canaleja: aproximación al análisis del Epipaleolítico y el Neolítico en el valle interior del Tajo. *Los Prim. Campesinos la Raya. Actas las jornadas Arqueol. del Mus. Cáceres.* 13-27 (2007).
- Davis, B. A. S. Pollen profile N-PEQ, Salada Pequeña, Spain. *Eur. Pollen Database (EPD), PANGAEA* (2010) doi:<https://doi.org/10.1594/PANGAEA.738850>.
- Davis, B. A. S. & Stevenson, A. C. The 8.2 ka event and Early-Mid Holocene forests, fires and flooding in the Central Ebro Desert, NE Spain. *Quat. Sci. Rev.* 26, 1695-1712 (2007).
- de Beaulieu, J.-L., Miras, Y., Andrieu-Ponel, V. & Guiter, F. Vegetation dynamics in north-western Mediterranean regions: instability of the Mediterranean bioclimate. *Plant Biosyst.* 139, 114-126 (2005).
- Dorado-Valiño, M., López-Sáez, J. A. & García-Gómez, E. 21. Patateros, Toledo Mountains (central Spain). *Grana* 53, 171-173 (2014).
- Dorado-Valiño, M., López-Sáez, J. A. & García-Gómez, E. 26. Valdeyernos, Toledo Mountains (central Spain). *Grana* 53, 315-317 (2014).
- Ejarque, A. et al. Coastal evolution in a Mediterranean microtidal zone: Mid to Late Holocene natural dynamics and human management of the Castelló lagoon, NE Spain. *PLoS One* 11, e0155446 (2016).
- Franco-Múgica, F., García-Antón, M., Maldonado-Ruiz, J., Morla-Juaristi, C. & Sainz-Ollero, H. Ancient pine forest on inland dunes in the Spanish northern meseta. *Quat. Res.* 63, 1-14 (2005).
- Garces-Pastor, S., Canellas-Bolta, N., Clavaguera, A., Calero, M. A. & Vegas-Vilarrubia, T. Vegetation shifts, human impact and peat bog development in Bassa Nera pond (Central Pyrenees) during the last millennium. *The Holocene* 27, 553-565 (2017).

- Gil-Romera, G., García Antón, M. & Calleja, J. A. The late Holocene palaeoecological sequence of Serranía de las Villuercas (southern Meseta, western Spain). *Veg. Hist. Archaeobot.* 17, 653-666 (2008).
- Gomes, S. D. 13. Lake Saloio (Nazaré, western Portugal). *Grana* 50, 228-231 (2011).
- González, A. V. & Saa, M. P. Pollen analyse of Holocene peat-bog in the Montes do Buio: Cuadramon (Galice), N.W. of Spain. *Quaternaire* 11, 257-267 (2000).
- González-Sampériz, P. et al. Climate variability in the Spanish Pyrenees during the last 30,000 yr revealed by the El Portalet sequence. *Quat. Res.* 66, 38-52 (2006).
- González-Sampériz, P. et al. Environmental and climate change in the southern Central Pyrenees since the Last Glacial Maximum: A view from the lake records. *Catena* 149, 668-688 (2017).
- Hannon, G. Late Quaternary vegetation of Sanabria Marsh, North West Spain. (Trinity College, Dublin, Ireland, 1985).
- Janssen, C. R. & Woldringh, R. E. A preliminary radiocarbon dated pollen sequence from the Serra da Estrela, Portugal. *Finisterra* 16, 299-309 (1981).
- Jiménez-Moreno, G., García-Alix, A., Hernández-Corbalán, M. D., Anderson, R. S. & Delgado-Huertas, A. Vegetation, fire, climate and human disturbance history in the southwestern Mediterranean area during the late Holocene. *Quat. Res.* 79, 110-122 (2013).
- Julio Camarero, J. et al. Abrupt regime shifts in post-fire resilience of Mediterranean mountain pinewoods are fuelled by land use. *Int. J. Wildl. Fire* 28, 329-341 (2019).
- Leunda, M. et al. The Late-Glacial and Holocene Marboré Lake sequence (2612 m a.s.l., Central Pyrenees, Spain): Testing high altitude sites sensitivity to millennial scale vegetation and climate variability. *Glob. Planet. Change* 157, 214-231 (2017).
- Leunda, M. et al. Ice cave reveals environmental forcing of long-term Pyrenean tree line dynamics. *J. Ecol.* 107, 814-828 (2019).
- López-Merino, L., Cortizas, A. M. & López-Sáez, J. A. Early agriculture and palaeoenvironmental history in the North of the Iberian Peninsula: a multi-proxy analysis of the Monte Areo mire (Asturias, Spain). *J. Archaeol. Sci.* 37, 1978-1988 (2010).
- López-Merino, L., Cortizas, A. M. & López-Sáez, J. A. Human-induced changes on wetlands: A study case from NW Iberia. *Quat. Sci. Rev.* 30, 2745-2754 (2011).
- López-Merino, L., López-Sáez, J. A., Alba-Sánchez, F., Pérez-Díaz, S. & Carrión, J. S. 2000 years of pastoralism and fire shaping high-altitude vegetation of Sierra de Gredos in central Spain. *Rev. Palaeobot. Palynol.* 158, 42-51 (2009).
- López-Merino, L., Sánchez, N. S., Kaal, J., López-Sáez, J. A. & Cortizas, A. M. Post-disturbance vegetation dynamics during the Late Pleistocene and the Holocene: An example from NW Iberia. *Glob. Planet. Change* 92, 58-70 (2012).
- López-Merino, L. et al. Estudio polínico de una laguna endorreica en Almenara de Adaja (Valladolid, Meseta Norte): cambios ambientales y actividad humana durante los últimos 2.800 años. *Rev. española Micropaleontol.* 41, 333-347 (2009).
- López-Sáez, J. A., Figueiral, I. & Cruz, D. Palaeoenvironment and vegetation dynamics in Serra da Nave (Alto Paiva, Beira Alta, Portugal) during the Late Pleistocene and the Holocene. *Estud. Pré-históricos* 19, 71-83 (2017).



- López-Sáez, J. A., Sánchez, M. & López, P. Evolución del Lanzahíta (Valle del Tiétar, vila) durante el Holoceno reciente: Una interpretación palinológica. Trasierra 1999, 81-86 (1999).
- López-Sáez, J. A. et al. Palaeoecological potential of the marine organic deposits of *Posidonia oceanica*: A case study in the NE Iberian Peninsula. Palaeogeogr. Palaeoclimatol. Palaeoecol. 271, 215-224 (2009).
- López-Sáez, J. A. et al. Late Holocene ecological history of *Pinus pinaster* forests in the Sierra de Gredos of central Spain. Plant Ecol. 206, 195-209 (2010).
- López-Sáez, J. A. et al. 20. Culazón, Cantabrian Mountains (northern Spain). Grana 52, 316-318 (2013).
- López-Sáez, J. A. et al. Landscape dynamics and human impact on high-mountain woodlands in the western Spanish Central System during the last three millennia. J. Archaeol. Sci. Reports 9, 203-218 (2016).
- López-Sáez, J. A. et al. Paleofire dynamics in Central Spain during the Late Holocene: The role of climatic and anthropogenic forcing. L. Degrad. Dev. 29, 2045-2059 (2018a).
- López-Sáez, J. A. et al. Mid-late Holocene environmental and cultural dynamics at the south-west tip of Europe (Doñana National Park, SW Iberia, Spain). J. Archaeol. Sci. Reports 22, 58-78 (2018b).
- López-Sáez, J. A. et al. Late Glacial-early holocene vegetation and environmental changes in the western Iberian Central System inferred from a key site: The Navamuño record, Béjar range (Spain). Quat. Sci. Rev. 230, 106-167 (2020).
- Luelmo-Lautenschlaeger, R., Blarquez, O., Pérez-Díaz, S., Morales-Molino, C. & López-Sáez, J. A. The Iberian Peninsula's Burning Heart: Long-term fire history in the Toledo Mountains (Central Spain). Fire 2, 54 (2019a).
- Luelmo-Lautenschlaeger, R., López Sáez, J. A. & Pérez Díaz, S. Contributions to the European Pollen Database. Botija, Toledo Mountains (central Spain). (2018b).
- Luelmo-Lautenschlaeger, R., Pérez-Díaz, S., Alba-Sánchez, F., Abel-Schaad, D. & López-Sáez, J. A. Vegetation history in the Toledo Mountains (central Iberia): human impact during the last 1300 years. Sustainability 10, 2575 (2018a).
- Luelmo-Lautenschlaeger, R., Pérez-Díaz, S., Blarquez, O., Morales-Molino, C. & López-Sáez, J. A. The Toledo Mountains: A resilient landscape and a landscape for resilience? Hazards and strategies in a mid-elevation mountain region in Central Spain. Quaternary 2, 35 (2019b).
- Luelmo-Lautenschlaeger, R., López-Sáez, J. A. & Pérez-Díaz, S. 39. Las Lanchas, Toledo Mountains (central Spain). Grana 57, 246-248 (2018c).
- Manzano, S. et al. A palaeoecological approach to understanding the past and present of Sierra Nevada, a Southwestern European biodiversity hotspot. Glob. Planet. Change 175, 238-250 (2019).
- Mariscal, B. Comparación palinológica entre una turbera de la cordillera central y unas turberas de la cordillera cantábrica. In II. European Paleobot 28 (1989).
- Mariscal, B. Variación de la vegetación holocena (4300-280 B.P.) de Cantabria a través del análisis polínico de la turbera del Alsa. Estud. geológicos 49, 63-69 (1993).
- Mariscal Alvarez, B. Estudio polínico de la turbera del Cueto de la Avellanosa, Polaciones (Cantabria). VI Reunión do grupo español de traballo de Cuaternario. Cuad. do Lab. Xeolóxico Laxe 5, 205-226 (1983).
- Mariscal Alvarez, B. Análisis polínico de la turbera del Pico del Sertal, de la Sierra de Paña Sagra. Reconstrucción de la paleoflora y de la paleoclimatología durante

- el Holoceno en la zona central de la Cordillera Cantábrica. Quat. Clim. West. Mediterr. Madrid Univ. Autónoma (1986).
- Martín-Puertas, C. et al. Arid and humid phases in southern Spain during the last 4000 years: the Zoñar Lake record, Córdoba. *The Holocene* 18, 907-921 (2008).
- Mateus, J.E. The coastal lagoon region near Carvalhal during the Holocene; some geomorphological aspects derived from palaeoecological study at Lagoa Travessa (1985).
- Mateus, J.E. Lagoa Travessa: a Holocene pollen diagram from the south-west coast of Portugal. *Revista Biol.* 14, 17-94 (1989).
- McKeever, M. Comparative palynological studies of two lake sites in western Ireland and northwestern Spain. (Trinity College, Dublin, Ireland, 1984).
- Mighall, T. M., Martínez Cortizas, A., Biester, H. & Turner, S. E. Proxy climate and vegetation changes during the last five millennia in NW Iberia: Pollen and non-pollen palynomorph data from two ombrotrophic peat bogs in the north western Iberian Peninsula. *Rev. Palaeobot. Palynol.* 141, 203-223 (2006).
- Miras, Y., Ejarque, A., Riera Mora, S., Orengo, H. A. & Palet Martinez, J. M. 28. Andorran high Pyrenees (Perafita Valley, Andorra): SerraMijtana fen. *Grana* 54, 313-316 (2015).
- Miras, Y. et al. Dynamique holocène de la végétation et occupation des Pyrénées andorranes depuis le Néolithique ancien, d'après l'analyse pollinique de la tourbière de Bosc dels Estanyons (2180 m, Vall del Madriu, Andorre). *Comptes Rendus Palevol* 16, 291-300 (2007).
- Miras, Y. et al. Prehistoric impact on landscape and vegetation at high altitudes: An integrated palaeoecological and archaeological approach in the eastern Pyrenees (Perafita valley, Andorra). *Plant Biosyst.* 144, 924-939 (2010).
- Moe, D. & Van Der Knaap, W. O. Transhumance in mountain areas: Additional interpretation of three pollen diagrams from Norway, Portugal and Switzerland. *Pact* 91-103 (1990).
- Morales-Molino, C. & García-Antón, M. Vegetation and fire history since the last glacial maximum in an inland area of the western Mediterranean Basin (Northern Iberian Plateau, NW Spain). *Quat. Res.* 81, 63-77 (2014).
- Morales-Molino, C., García Antón, M. & Morla, C. Late Holocene vegetation dynamics on an Atlantic-Mediterranean mountain in NW Iberia. *Palaeogeogr. Palaeoclimatol. Palaeoecol.* 302, 323-337 (2011).
- Morales-Molino, C., García-Antón, M., Postigo-Mijarra, J. M. & Morla, C. Holocene vegetation, fire and climate interactions on the westernmost fringe of the Mediterranean Basin. *Quat. Sci. Rev.* 59, 5-17 (2013).
- Morales-Molino, C., Tinner, W., García-Antón, M. & Colombaroli, D. The historical demise of *Pinus nigra* forests in the Northern Iberian Plateau (south-western Europe). *J. Ecol.* 105, 634-646 (2017b).
- Morales-Molino, C. et al. Land-use history as a major driver for long-term forest dynamics in the Sierra de Guadarrama National Park (central Spain) during the last millennia: implications for forest conservation and management. *Glob. Planet. Change* 152, 64-75 (2017a).
- Morales-Molino, C. et al. Vegetation and fire dynamics during the last 4000 years in the Cabañeros National Park (central Spain). *Rev. Palaeobot. Palynol.* 253, 110-122 (2018).
- Morales-Molino, C. et al. Unprecedented herbivory threatens rear-edge populations of *Betula* in southwestern Eurasia. *Ecology* 100, e02833 (2019).

- Morellón, M. et al. Climate changes and human activities recorded in the sediments of Lake Estanya (NE Spain) during the Medieval Warm Period and Little Ice Age. *J. Paleolimnol.* 46, 423-452 (2011).
- Moreno, A. et al. Revealing the last 13,500 years of environmental history from the multiproxy record of a mountain lake (Lago Enol, northern Iberian Peninsula). *J. Paleolimnol.* 46, 327-349 (2011).
- Múgica, F. F., Antón, M. G., Ruiz, J. M., Juaristi, C. M. & Ollerol, H. S. The Holocene history of *Pinus* forests in the Spanish Northern Meseta. *The Holocene* 11, 343-358 (2001).
- Pantaléon-Cano, J., Yll, E.-I., Pérez-Obiol, R. & Roure, J. M. Palynological evidence for vegetational history in semi-arid areas of the western Mediterranean (Almería, Spain). *The Holocene* 13, 109-119 (2003).
- Penalba, M.C. Dynamique de végétation tardiglaciaire et holocène du Centre-Nord de l'Espagne d'après l'analyse pollinique. (Aix-Marseille 3, 1989).
- Penalba, M.C. The history of the Holocene vegetation in northern Spain from pollen analysis. *Journal of Ecology*, 82(4), 815, doi:10.2307/2261446 (1994).
- Penalba, M.C. and Garmendia, M.P. 1989 Dynamique de végétation tardiglaciaire et holocène du Centre-Nord de l'Espagne d'après l'analyse pollinique. Aix-Marseille 3. Available at: <https://www.theses.fr/1989AIX30033> (Accessed: 22 March 2021).
- Pérez-Díaz, S. & López-Sáez, J. A. 33. Verdeospesoa mire (Basque Country, Northern Iberian Peninsula, Spain). *Grana* 56, 315-317 (2017).
- Pérez-Díaz, S., López-Sáez, J. A., Núñez de la Fuente, S. & Ruiz-Alonso, M. Early farmers, megalithic builders and the shaping of the cultural landscapes during the Holocene in Northern Iberian mountains. A palaeoenvironmental perspective. *J. Archaeol. Sci. Reports* 18, 463-474 (2018).
- Pérez-Obiol, R. & Julià, R. Climatic change on the Iberian peninsula recorded in a 30,000-yr pollen record from lake Banyoles. *Quat. Res.* 41, 91-98 (1994).
- Pérez-Obiol, R., Bal, M. C., Pèlach, A., Cunill, R. & Soriano, J. M. Vegetation dynamics and anthropogenically forced changes in the Estanilles peat bog (southern Pyrenees) during the last seven millennia. *Veg. Hist. Archaeobot.* 21, 385-396 (2012).
- Pérez Obiol, R., Roure Nolla, J.M., Pantaleón-Cano, J., Yll Aguirre, E-I. Análisis polínico de una secuencia holocénica en Roquetas de Mar (Almería). in *Trabajos de Palinología básica y aplicada: X Simposio de Palinología*, (APLE, Valencia, septiembre 1994) 189-198 (1994).
- Pérez-Sanz, A. et al. Holocene climate variability, vegetation dynamics and fire regime in the central Pyrenees: the Basa de la Mora sequence (NE Spain). *Quat. Sci. Rev.* 73, 149-169 (2013).
- Ramos-Román, M. J. et al. Centennial-scale vegetation and North Atlantic Oscillation changes during the Late Holocene in the southern Iberia. *Quat. Sci. Rev.* 143, 84-95 (2016).
- Revelles, J. et al. Mid-Holocene vegetation history and Neolithic land-use in the Lake Banyoles area (Girona, Spain). *Palaeogeogr. Palaeoclimatol. Palaeoecol.* 435, 70-85 (2015).
- Revelles, J. et al. Human-environment interaction during the Mesolithic- Neolithic transition in the NE Iberian Peninsula. Vegetation history, climate change and human impact during the Early-Middle Holocene in the Eastern Pre-Pyrenees. *Quat. Sci. Rev.* 184, 183-200 (2018).

- Robles López, S., Manzano-Rodríguez, S., Pérez-Díaz, S. & López-Sáez, J. A. 35. Labradillos mire, Gregos Range (central Spain). *Grana* 56, 398-400 (2017).
- Robles-López, S. et al. Vulnerabilidad y resiliencia de los pinares de alta montaña de la Sierra de Gredos (Avila, sistema central): Dos mil años de dinámica socioecológica. *Cuaternario y Geomorfol.* 31, 51-72 (2017).
- Robles-López, S. et al. The dialectic between deciduous and coniferous forests in central Iberia: A palaeoenvironmental perspective during the late Holocene in the Gredos range. *Quat. Int.* 470, 148-165 (2018).
- Robles-López, S. et al. Holocene vegetation and fire dynamics in the supra-Mediterranean belt of the Gredos Range (central Iberian Peninsula), *Plant Biosystems* 154, 74–86, doi:10.1080/11263504.2019.1578281 (2020).
- Sanchez Goñi, M. F. & Hannon, G. E. High-altitude vegetational pattern on the Iberian Mountain Chain (north-central Spain) during the Holocene. *The Holocene* 9, 39-57 (1999).
- Schneider, H., Höfer, D., Trog, C. & Mäusbacher, R. Holocene landscape development along the Portuguese Algarve coast - A high resolution palynological approach. *Quat. Int.* 407, 47-63 (2016).
- Schneider, H. et al. Holocene estuary development in the Algarve Region (Southern Portugal) - A reconstruction of sedimentological and ecological evolution. *Quat. Int.* 221, 141-158 (2010).
- Silva-Sánchez, N., Martínez Cortizas, A., Abel-Schaad, D., López-Sáez, J. A. & Mighall, T. M. Influence of climate change and human activities on the organic and inorganic composition of peat during the 'Little Ice Age' (El Payo mire, W Spain). *The Holocene* 26, 1290-1303 (2016).
- Stefanini, B. A comparison of climate and vegetation dynamics in central Ireland and NW Spain since the mid-Holocene. (University of Dublin, Trinity College, Dublin, Ireland, 2008).
- Stevenson, A. C. The Holocene forest history of the Montes Universales, Teruel, Spain. *The Holocene* 10, 603-610 (2000).
- Turner, C. & Hannon, G. E. Vegetational evidence for late Quaternary climatic changes in southwest Europe in relation to the influence of the North Atlantic Ocean. *Philos. Trans. R. Soc. London. B, Biol. Sci.* 318, 451-485 (1988).
- Valero-Garces, B. et al. Responses of a saline lake ecosystem in a semiarid region to irrigation and climate variability. *Ambio.* 29, 344-350 (2000).
- van den Brink, L. M. & Janssen, C. R. The effect of human activities during cultural phases on the development of montane vegetation in the Serra de Estrela, Portugal. *Rev. Palaeobot. Palynol.* 44, 193-215 (1985).
- van der Knaap, W. O. & van Leeuwen, J. Holocene vegetation, human impact, and climatic change in the Serra da Estrela, Portugal. *Diss. Bot.* 234, 497-535 (1984).
- van der Knaap, W. O. & van Leeuwen, J. Holocene vegetation succession and degradation as responses to climatic change and human activity in the Serra de Estrela, Portugal. *Rev. Palaeobot. Palynol.* 89, 153-211 (1995).
- van der Knaap, W. O. & van Leeuwen, J. Late Glacial and early Holocene vegetation succession, altitudinal vegetation zonation, and climatic change in the Serra da Estrela, Portugal. *Rev. Palaeobot. Palynol.* 97, 239-285 (1997).
- von Engelbrechten, S. Late-glacial and Holocene vegetation and environmental history of the Sierra de Urbión, North-West Central Spain. (Trinity College, Dublin, Ireland, 1999).

- Yll, E.I. et al. Vegetational change in the Balearic Islands (Spain) during the Holocene. *Historical Biology* 9, 83-89 (1994).
- Yll, E.I., Perez-Obiol, R. R., Pantaleon-Cano, J. & Roure, J. M. Dinámica del paisaje vegetal en la vertiente mediterránea de la Península Ibérica e Islas Baleares desde el Tardiglaciario hasta el presente. *Reconstrucción Paleoaambientes y cambios climáticos durante el Cuaternario* 3, 319-328 (1995).
- Yll, E.I., Perez-Obiol, R. R., Pantaleon-Cano, J. & Roure, J. M. Palynological evidence for climatic change and human activity during the Holocene on Minorca (Balearic Islands). *Quat. Research* 48, 339-347 (1997).
